# Supplementary material for: Cost evaluation of acute ischemic stroke in Latin America: a multicentric study
Source: PubMed Central journal article supplement (PMC11665535; doi:10.1016/j.lana.2024.100959), 2024-12-06
Supplement: mmc2.pdf [file mmc2.pdf]

**Supplementary Material Files**

**Supplementary Material I: Research Conduction**

**Supplementary Material II: The steps to apply the TDABC method**

**Supplementary Material III: Departmental Length of Stay**

**Supplementary Material IV: Separate file**

**Supplementary Material V: Cost Composition Information Per Country, Risk Level, and Therapy**

**Supplementary Material VI: Median and Interquartile Range Values of Costs Based on Treatments by Center and Costs Based on Treatment by Risk Levels**

### Supplementary Material I: Research Conduction

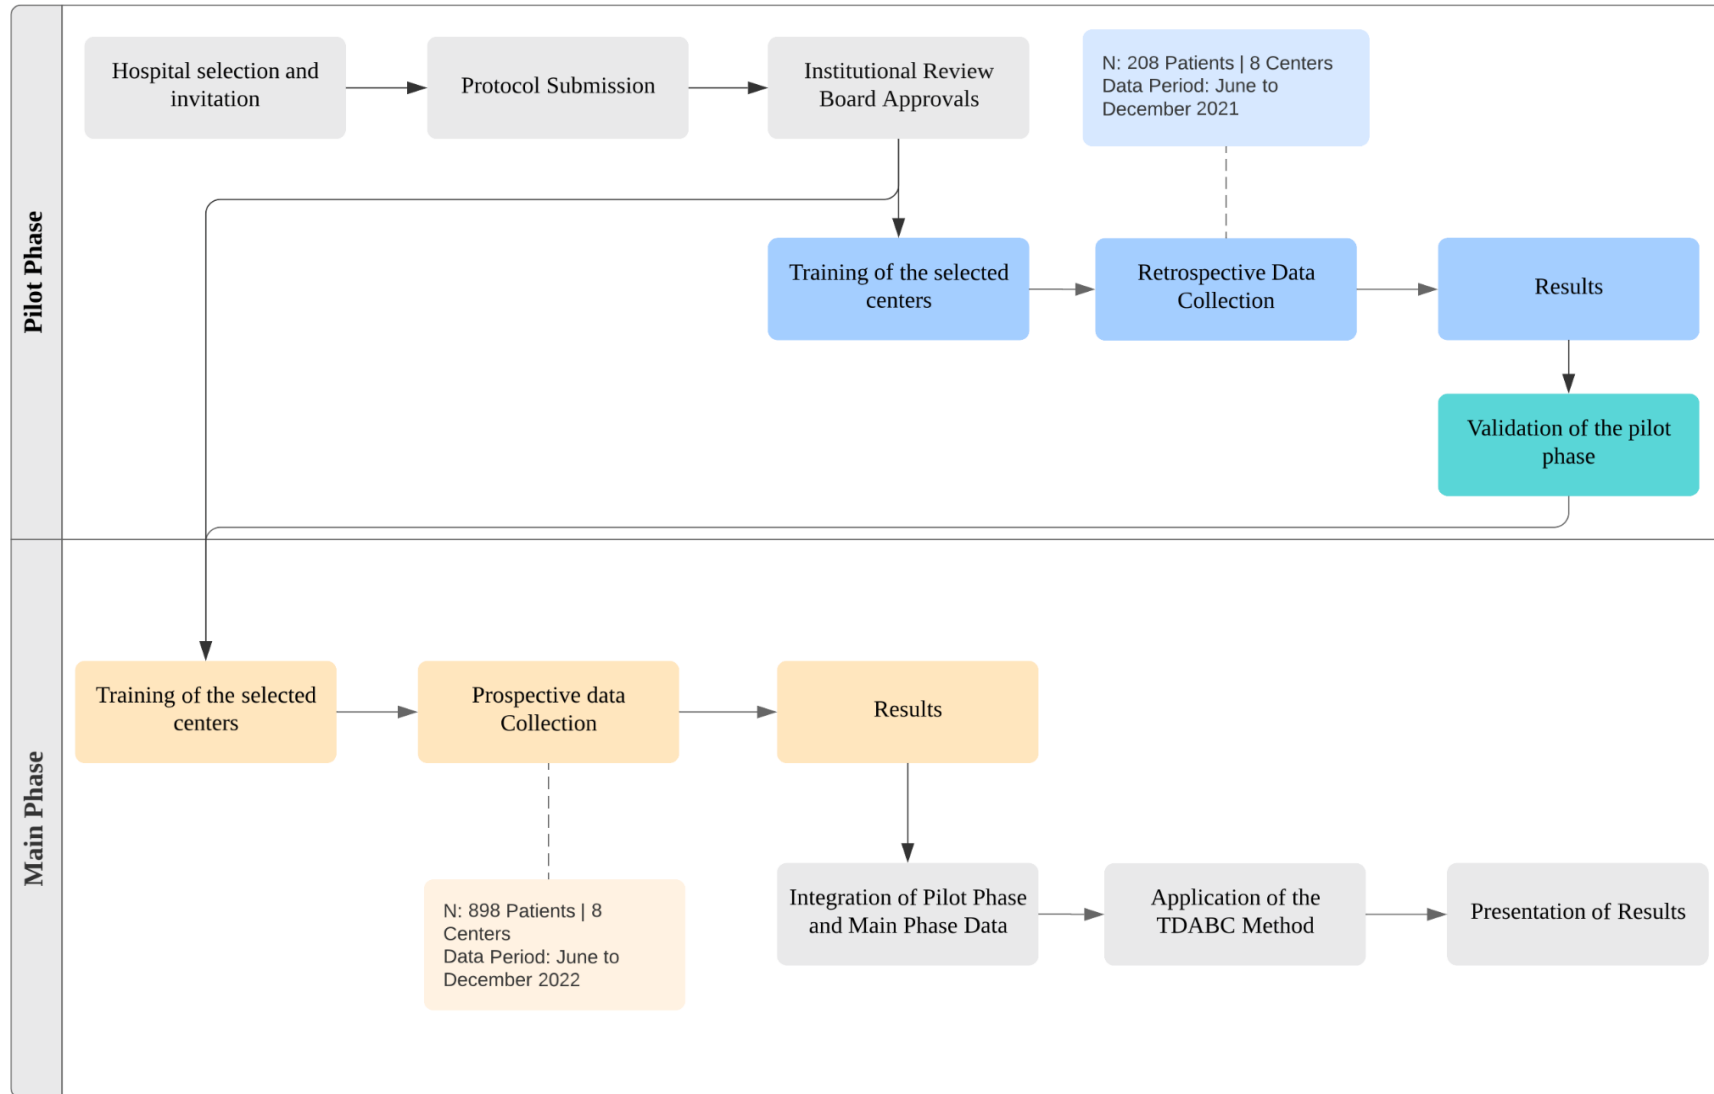

**Supplementary Material II: The steps to apply the TDABC method**

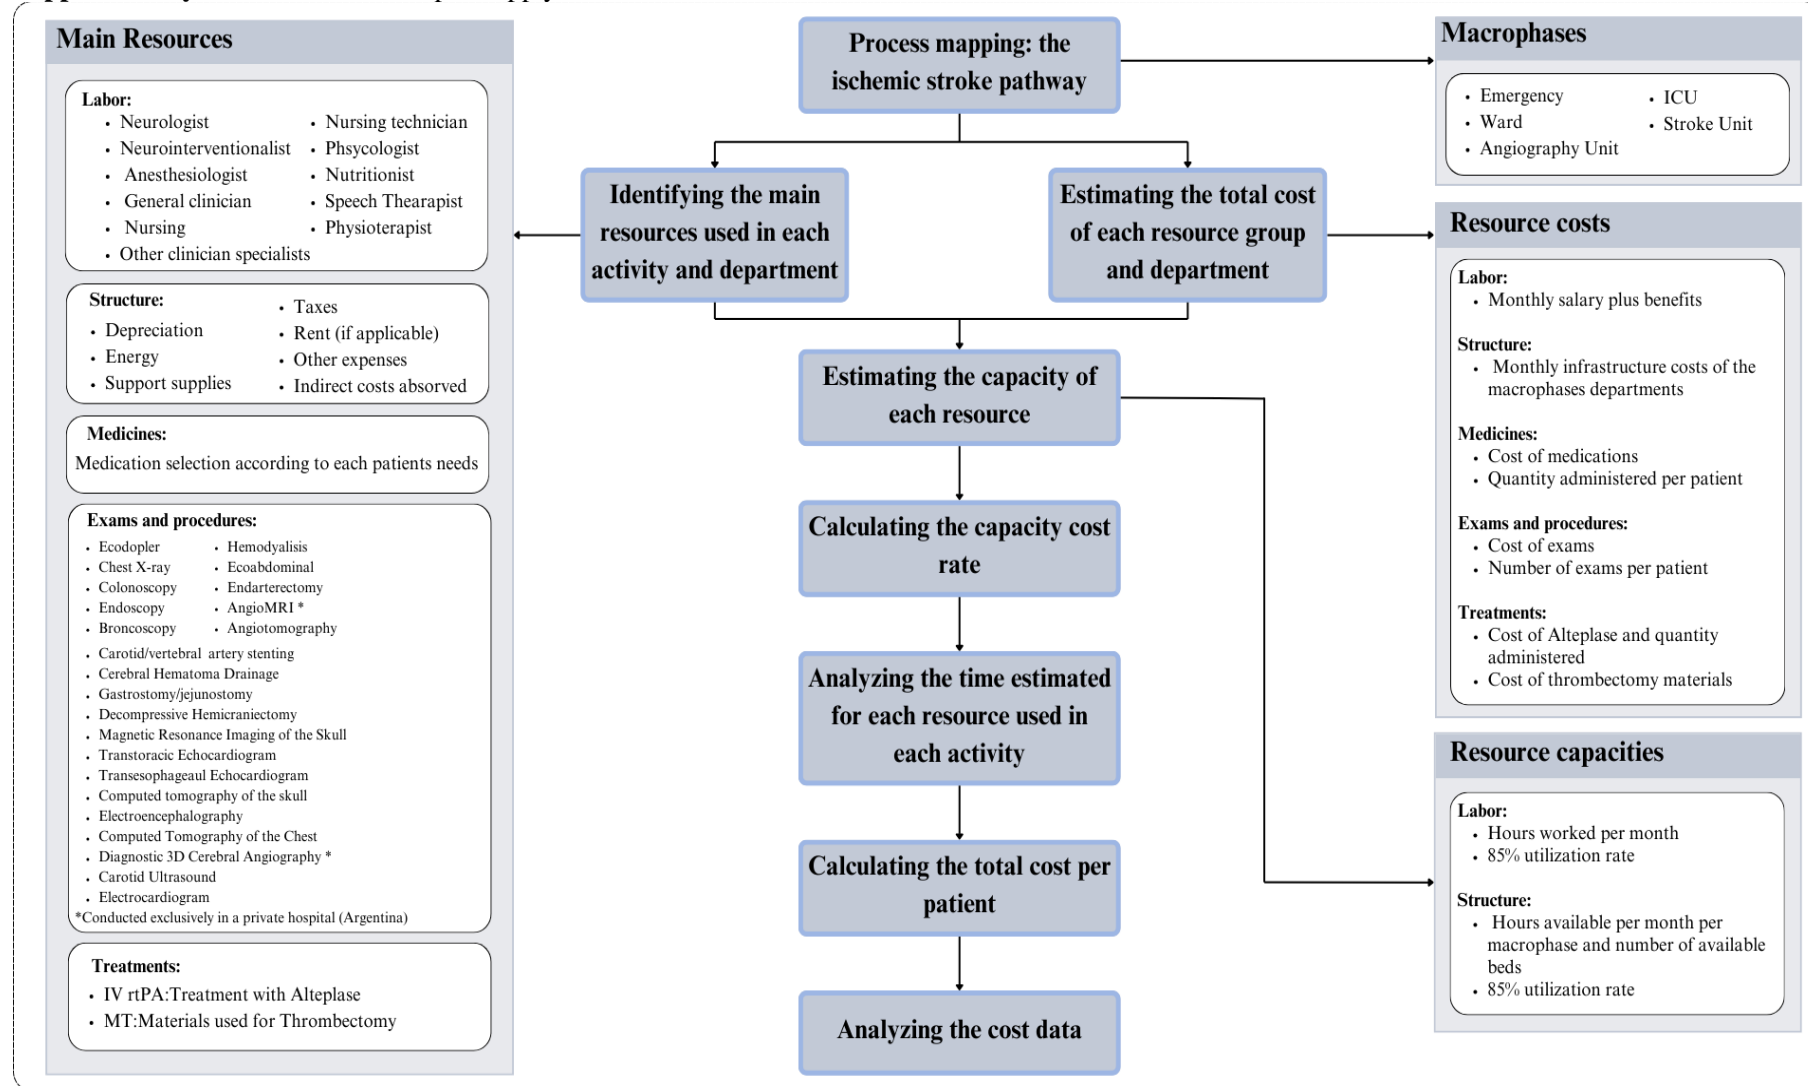

**Supplementary Material III: Departmental Length of Stay**

|            | Mean LOT<br>Emergency (SD) | Mean LOT Ward<br>(SD) | Mean LOT<br>Angiography Unit<br>(SD) | Mean LOT ICU<br>(SD) | Mean LOT Stroke<br>Unit (SD) |
|------------|----------------------------|-----------------------|--------------------------------------|----------------------|------------------------------|
| Argentina  | 4.6 (4.7)                  | 98.9 (322.1)          | 2.7 (0.8)                            | 86.5 (47.5)          | 61 (45.4)                    |
| Brazil     | 73.2 (67.1)                | 103.2 (84.2)          | 2 (1.1)                              | 89.5 (64)            | 170 (105.8)                  |
| Chile      | 61.2 (34.5)                | 0.5 (-)               | 1 (-)                                | 48.5 (67,2)          | 232.6 (303.8)                |
| Colombia   | 7.0 (18.4)                 | 121.6 (189.4)         | 2.6 (3.6)                            | 82.4 (67.1)          | 110.7 (119.6)                |
| Costa Rica | 2.4 (3.1)                  | 347.2 (298.4)         | 1.4 (0.5)                            | 49.9 (46.4)          | 82.8 (35.7)                  |
| Mexico     | 76.1 (75.3)                | 343.9 (416)           | 2.6 (0.9)                            | 236.6 (185.6)        | NA                           |
| Peru       | 14 (13.4)                  | 154.2 (88.6)          | 1.7 (0.6)                            | 389.1 (272)          | 259.2 (152)                  |
| Uruguay    | 21.2 (17.8)                | 393.3 (374.8)         | 2.2 (0.9)                            | 298.1 (499)          | 138.9 (103.8)                |

**Legend:** SD: Standard Deviation; NA = Not applicable; LOT = Length of Time  
All values in the table are in hours.

**Supplementary Material IV:** Separate file

**Supplementary Material V: Cost Composition Information Per Country, Risk Level, and Therapy.**

|         |             |             |               |               |                        |               |                      |             |            |             |             |              | Structure Costs |  |
|---------|-------------|-------------|---------------|---------------|------------------------|---------------|----------------------|-------------|------------|-------------|-------------|--------------|-----------------|--|
| Country | Treatments* | Risk Levels | Labor Costs   | Thrombolysiss | Materials thrombectomy | Medicines     | Exams and procedures | Emergency   | Ward       | Angiography | ICU         | Stroke unit  | Total Cost      |  |
| Arg     | 1           | High        | 2352 (999)    | -             | -                      | 509 (694)     | 1353 (211)           | 39 (16)     | 544 (439)  | -           | -           | 1044 (560)   | 5839            |  |
| Arg     | 1           | Medium      | 1683 (1481)   | -             | -                      | 448 (2547)    | 1279 (506)           | 42 (33)     | 319 (484)  | -           | 19 (167)    | 823 (602)    | 4642            |  |
| Arg     | 1           | Low         | 2030 (2260)   | -             | -                      | 179 (274)     | 1550 (901)           | 48 (56)     | 927 (4272) | -           | -           | 920 (615)    | 5655            |  |
| Arg     | 2           | Medium      | 1891 (553)    | 4419 (2336)   | -                      | 417 (586)     | 1419 (443)           | 51 (74)     | 362 (365)  | 25 (66)     | -           | 1048 (684)   | 9998            |  |
| Arg     | 2           | Low         | 2018 (706)    | 5572 (1668)   | -                      | 490 (663)     | 1403 (482)           | 37 (14)     | 757 (591)  | -           | 483 (1079)  | 1197 (849)   | 11957           |  |
| Arg     | 3           | High        | 8194 (4378)   | -             | 6872 (3844)            | 887 (714)     | 2067 (1079)          | 23 (10)     | 554 (923)  | 165 (165)   | 206 (460)   | 1676 (1645)  | 20643           |  |
| Arg     | 3           | Medium      | 10434 (1521)  | -             | 8757 (807)             | 670 (350)     | 2208 (194)           | 62 (69)     | 1450 (422) | 155 (268)   | 329 (569)   | 1874 (1618)  | 25939           |  |
| Arg     | 4           | High        | 12855 (2522)  | 6029 (1523)   | 9683 (7157)            | 13541 (17331) | 2496 (953)           | 19 (20)     | 982 (787)  | 492 (164)   | 1632 (1698) | 1888 (2538)  | 49617           |  |
| Arg     | 4           | Medium      | 33270 (-)     | 6790 (-)      | 15674 (-)              | 13519 (-)     | 3631 (-)             | 14 (-)      | 16748 (-)  | 544 (-)     | 1452 (-)    | 94 (-)       | 91723           |  |
| Arg     | 4           | Low         | 11887 (-)     | 6790 (-)      | 9283 (-)               | 2644 (-)      | 2642 (-)             | 3 (-)       | 698 (-)    | 544 (-)     | 2949 (-)    | 1796 (-)     | 39246           |  |
|         |             |             |               |               |                        |               |                      |             |            |             |             |              | <b>8487</b>     |  |
| Br      | 1           | High        | 14982 (10006) | -             | -                      | 323 (352)     | 432 (268)            | 2432 (1566) | 8 (33)     | 20 (81)     | -           | 13802 (4975) | 31999           |  |
| Br      | 1           | Medium      | 10712 (15603) | -             | -                      | 294 (454)     | 389 (221)            | 2319 (2810) | 398 (1128) | 2 (16)      | 334 (1374)  | 8259 (6748)  | 22707           |  |
| Br      | 1           | Low         | 7663 (8243)   | -             | -                      | 242 (353)     | 503 (287)            | 2190 (1218) | 130 (442)  | 25 (67)     | 346 (860)   | 8065 (5665)  | 19164           |  |
| Br      | 2           | High        | 18562 (21224) | 1472 (278)    | -                      | 1399 (619)    | 529 (297)            | 2411 (1216) | 82 (327)   | -           | 1278 (3510) | 13020 (7436) | 38751           |  |
| Br      | 2           | Medium      | 9704 (12594)  | 1578 (222)    | -                      | 2375 (5265)   | 380 (203)            | 1543 (1207) | 123 (493)  | 16 (46)     | 783 (1632)  | 8960 (6239)  | 25462           |  |
| Br      | 2           | Low         | 7143 (9717)   | 1536 (248)    | -                      | 1055 (816)    | 574 (275)            | 2016 (868)  | 177 (432)  | -           | -           | 7773 (5925)  | 20275           |  |
| Br      | 3           | High        | 49385 (38322) | -             | 7066 (0)               | 391 (332)     | 465 (240)            | 194 (118)   | -          | 229 (143)   | 7611 (5274) | 20319 (7397) | 85661           |  |
| Br      | 3           | Medium      | 13278 (10058) | -             | 7066 (0)               | 376 (322)     | 447 (262)            | 219 (140)   | -          | 249 (50)    | 4681 (2278) | 9425 (5146)  | 35741           |  |
| Br      | 4           | High        | 28081 (2989)  | 1385 (194)    | 7066 (0)               | 1835 (129)    | 740 (7)              | 359 (34)    | -          | 367 (74)    | 4993 (2287) | 17489 (1760) | 62315           |  |
| Br      | 4           | Medium      | 2505 (-)      | 1522 (-)      | 7066 (-)               | 107 (-)       | 134 (-)              | 1512 (-)    | 295 (-)    | 210 (-)     | -           | 4794 (-)     | 18145           |  |

**27488**

|              |   |        |               |            |             |             |             |             |             |             |             |             |       |
|--------------|---|--------|---------------|------------|-------------|-------------|-------------|-------------|-------------|-------------|-------------|-------------|-------|
| Chi          | 1 | High   | 17763 (11731) | -          | -           | 80 (28)     | 688 (304)   | 1571 (705)  | 0 (2)       | 23 (114)    | -           | 8250 (7987) | 28374 |
| Chi          | 1 | Medium | 8598 (6553)   | -          | -           | 73 (16)     | 537 (288)   | 1796 (889)  | -           | -           | -           | 2012 (2511) | 13016 |
| Chi          | 1 | Low    | 6752 (3002)   | -          | -           | 76 (24)     | 428 (165)   | 1466 (909)  | -           | -           | 1 (4)       | 1845 (1365) | 10568 |
| Chi          | 2 | High   | 12982 (10009) | 265 (0)    | -           | 72 (6)      | 847 (362)   | 1943 (1378) | -           | -           | -           | 3997 (5082) | 21448 |
| Chi          | 2 | Medium | 6081 (2292)   | 289 (0)    | -           | 68 (4)      | 508 (119)   | 2062 (1311) | -           | -           | -           | 1849 (1321) | 12177 |
| Chi          | 2 | Low    | 10593 (8908)  | 319 (0)    | -           | 75 (24)     | 774 (431)   | 1613 (891)  | -           | -           | 199 (716)   | 3072 (3965) | 17858 |
| Chi          | 3 | High   | 29674 (-)     | -          | 7066 (-)    | 66 (-)      | 1589 (-)    | 196 (-)     | -           | -           | -           | 15674 (-)   | 54265 |
| Chi          | 3 | Medium | 4015 (-)      | -          | 7066 (-)    | 65 (-)      | 327 (-)     | 759 (-)     | -           | -           | -           | 1176 (-)    | 13408 |
| Chi          | 3 | Low    | 7895 (-)      | -          | 7066 (-)    | 76 (-)      | 448 (-)     | 2050 (-)    | -           | -           | -           | 2351 (-)    | 19876 |
| <b>16233</b> |   |        |               |            |             |             |             |             |             |             |             |             |       |
| Col          | 1 | High   | 1060 (662)    | -          | -           | 478 (784)   | 1295 (572)  | 110 (282)   | 135 (788)   | 99 (323)    | 2288 (1674) | 1225 (1231) | 6690  |
| Col          | 1 | Medium | 872 (594)     | -          | -           | 340 (738)   | 1421 (745)  | 155 (341)   | 311 (740)   | 213 (490)   | 1611 (1298) | 790 (1544)  | 5713  |
| Col          | 1 | Low    | 911 (833)     | -          | -           | 336 (596)   | 1417 (434)  | 137 (272)   | 536 (2324)  | 653 (2501)  | 1697 (1912) | 1030 (1779) | 6718  |
| Col          | 2 | High   | 1452 (1178)   | 1849 (436) | -           | 888 (520)   | 1555 (575)  | 376 (1014)  | 35 (112)    | 112 (236)   | 2934 (2575) | 1618 (2357) | 10819 |
| Col          | 2 | Medium | 953 (270)     | 1911 (393) | -           | 1420 (1130) | 1271 (525)  | 48 (33)     | 357 (795)   | 160 (274)   | 2346 (1863) | 595 (815)   | 9063  |
| Col          | 2 | Low    | 551 (355)     | 1532 (560) | -           | 1098 (392)  | 1449 (494)  | 45 (20)     | -           | -           | 1577 (1543) | 383 (348)   | 6634  |
| Col          | 3 | High   | 1842 (828)    | -          | 8107 (2619) | 869 (750)   | 1576 (408)  | 35 (25)     | 11 (34)     | 1330 (1075) | 3379 (2124) | 881 (1366)  | 18030 |
| Col          | 3 | Medium | 2110 (996)    | -          | 3684 (1395) | 1051 (1147) | 1843 (250)  | 189 (261)   | 326 (565)   | 923 (1148)  | 3656 (4757) | 427 (489)   | 14209 |
| Col          | 3 | Low    | 1435 (516)    | -          | 8919 (1186) | 907 (745)   | 1737 (326)  | 147 (173)   | 349 (604)   | 555 (552)   | 3621 (2655) | 534 (667)   | 18203 |
| Col          | 4 | High   | 1663 (646)    | 1904 (390) | 8266 (2021) | 1188 (576)  | 1338 (343)  | 39 (26)     | 43 (113)    | 1157 (1186) | 2120 (965)  | 1007 (1313) | 18725 |
| Col          | 4 | Medium | 1330 (210)    | 2043 (0)   | 5261 (3506) | 1426 (290)  | 1883 (655)  | 48 (13)     | -           | 828 (1171)  | 1936 (0)    | 1121 (680)  | 15877 |
| Col          | 4 | Low    | 2280 (-)      | 2043 (-)   | 5353 (-)    | 1842 (-)    | 2059 (-)    | 57 (-)      | -           | 2208 (-)    | 1936 (-)    | 1922 (-)    | 19700 |
| <b>16233</b> |   |        |               |            |             |             |             |             |             |             |             |             |       |
| Cos          | 1 | High   | 1712 (1511)   | -          | -           | NA          | 1358 (739)  | 58 (87)     | 3328 (4008) | -           | 94 (723)    | 375 (589)   | 6924  |
| Cos          | 1 | Medium | 992 (876)     | -          | -           | NA          | 1131 (1555) | 50 (45)     | 1072 (2472) | -           | -           | 730 (618)   | 3976  |
| Cos          | 1 | Low    | 1083 (876)    | -          | -           | NA          | 1396 (1912) | 63 (43)     | 1018 (2433) | -           | -           | 919 (596)   | 4478  |

|     |   |        |               |            |             |             |             |             |              |            |               |             |              |
|-----|---|--------|---------------|------------|-------------|-------------|-------------|-------------|--------------|------------|---------------|-------------|--------------|
| Cos | 2 | High   | 1177 (751)    | 800 (0)    | -           | NA          | 1478 (725)  | 8 (6)       | 810 (1698)   | 71 (207)   | 72 (304)      | 1124 (587)  | 5539         |
| Cos | 2 | Medium | 795 (206)     | 800 (0)    | -           | NA          | 2061 (3603) | 10 (7)      | 146 (461)    | -          | -             | 957 (467)   | 4768         |
| Cos | 2 | Low    | 740 (188)     | 800 (0)    | -           | NA          | 3618 (5087) | 31 (52)     | -            | -          | -             | 1035 (231)  | 6225         |
| Cos | 3 | High   | 1551 (856)    | -          | 6915 (2355) | NA          | 4102 (5931) | 9 (4)       | 364 (729)    | 598 (465)  | 806 (812)     | 1398 (952)  | 15743        |
| Cos | 3 | Medium | 1008 (-)      | -          | 6051 (-)    | NA          | 556 (-)     | 19 (-)      | -            | 662 (-)    | 645 (-)       | 641 (-)     | 9583         |
| Cos | 4 | High   | 2044 (1300)   | 800 (0)    | 8479 (1480) | NA          | 8113 (6126) | 12 (10)     | 1118 (2053)  | 862 (349)  | 553 (784)     | 1678 (1191) | 23659        |
| Cos | 4 | Medium | 1082 (318)    | 800 (0)    | 6701 (2091) | NA          | 1239 (274)  | 6 (3)       | 729 (1457)   | 593 (83)   | 806 (323)     | 721 (842)   | 12677        |
|     |   |        |               |            |             |             |             |             |              |            |               |             | <b>6334</b>  |
| Mex | 1 | High   | 12126 (9721)  | -          | -           | 1043 (3125) | 675 (346)   | 2021 (1724) | 2827 (4403)  | -          | 614 (1788)    | -           | 19307        |
| Mex | 1 | Medium | 4355 (5387)   | -          | -           | 25 (46)     | 435 (238)   | 881 (807)   | 789 (3187)   | -          | 161 (721)     | -           | 6646         |
| Mex | 1 | Low    | 3191 (4076)   | -          | -           | 76 (239)    | 425 (186)   | 784 (1062)  | 227 (638)    | 45 (224)   | -             | -           | 4748         |
| Mex | 2 | High   | 10583 (7371)  | 2161 (39)  | -           | 673 (1324)  | 568 (164)   | 2272 (1621) | 1354 (1742)  | -          | 501 (1463)    | -           | 18113        |
| Mex | 2 | Medium | 5753 (3384)   | 2123 (0)   | -           | 21 (31)     | 586 (164)   | 1440 (671)  | 291 (771)    | -          | -             | -           | 10215        |
| Mex | 2 | Low    | 3683 (1665)   | 2148 (44)  | -           | 11 (14)     | 419 (97)    | 927 (443)   | -            | -          | -             | -           | 7187         |
| Mex | 3 | High   | 22829 (23086) | -          | 14991 (304) | 184 (154)   | 836 (633)   | 2318 (2828) | 7577 (13124) | 1662 (543) | 5807 (10057)  | -           | 56204        |
| Mex | 4 | Low    | 9814 (-)      | 2123 (-)   | 14815 (-)   | 10 (-)      | 523 (-)     | 2290 (-)    | 583 (-)      | 1104 (-)   | -             | -           | 31263        |
|     |   |        |               |            |             |             |             |             |              |            |               |             | <b>13326</b> |
| Per | 1 | High   | 1670 (1047)   | -          | -           | 193 (330)   | 1057 (239)  | 257 (247)   | 29 (42)      | -          | 177 (789)     | 3739 (2516) | 7121         |
| Per | 1 | Medium | 1153 (422)    | -          | -           | 73 (147)    | 1061 (245)  | 144 (107)   | 24 (39)      | 64 (428)   | 54 (365)      | 2408 (1381) | 4982         |
| Per | 1 | Low    | 964 (379)     | -          | -           | 24 (38)     | 1088 (245)  | 136 (116)   | 10 (23)      | 166 (619)  | -             | 2437 (1403) | 4824         |
| Per | 2 | High   | 2233 (1279)   | 2216 (35)  | -           | 180 (123)   | 1165 (134)  | 268 (324)   | 27 (46)      | -          | 3028 (5244)   | 2338 (900)  | 11454        |
| Per | 2 | Medium | 1154 (374)    | 2216 (35)  | -           | 118 (186)   | 1218 (199)  | 286 (152)   | 18 (23)      | -          | -             | 2202 (722)  | 7213         |
| Per | 2 | Low    | 795 (155)     | 1677 (791) | -           | 5 (0)       | 1011 (117)  | 128 (124)   | -            | -          | -             | 2191 (273)  | 5806         |
|     |   |        |               |            |             |             |             |             |              |            |               |             | <b>5902</b>  |
| Uru | 1 | High   | 2417 (3668)   | -          | -           | 403 (446)   | 1726 (1584) | 680 (644)   | 3782 (4388)  | -          | 10518 (19549) | 1463 (2585) | 20989        |
| Uru | 1 | Medium | 1098 (918)    | -          | -           | 179 (255)   | 1341 (1234) | 366 (364)   | 4596 (4603)  | -          | 368 (1358)    | 983 (1055)  | 8932         |
| Uru | 1 | Low    | 1469 (1729)   | -          | -           | 63 (100)    | 1499 (1725) | 352 (247)   | 3850 (5666)  | -          | 437 (1461)    | 975 (917)   | 8644         |



|     |   |        |             |             |              |           |             |           |             |            |              |             |       |
|-----|---|--------|-------------|-------------|--------------|-----------|-------------|-----------|-------------|------------|--------------|-------------|-------|
| Uru | 2 | High   | 1920 (1668) | 1410 (19)   | -            | 133 (105) | 1417 (390)  | 282 (239) | 4583 (4690) | -          | 523 (957)    | 1526 (1833) | 11794 |
| Uru | 2 | Medium | 2126 (1182) | 1402 (27)   | -            | 77 (33)   | 1417 (320)  | 458 (261) | 3708 (3426) | -          | -            | 2210 (1620) | 11398 |
| Uru | 2 | Low    | 1054 (261)  | 1390 (30)   | -            | 36 (25)   | 1341 (350)  | 296 (251) | 3488 (1811) | -          | -            | 1510 (705)  | 9114  |
| Uru | 3 | High   | 2143 (2610) | -           | 9097 (3876)  | 304 (388) | 1856 (1426) | 29 (13)   | -           | 1104 (781) | 9678 (11861) | -           | 24210 |
| Uru | 3 | Medium | 2595 (311)  | -           | 4960 (-)     | 79 (68)   | 1381 (30)   | -         | 5828 (2061) | 1104 (0)   | 645 (0)      | 801 (680)   | 17394 |
| Uru | 4 | High   | 1363 (929)  | 7645 (5928) | 10900 (2472) | 299 (351) | 1624 (687)  | 50 (26)   | 1304 (2259) | 1393 (737) | 5044 (5177)  | 2342 (4057) | 31965 |
| Uru | 4 | Medium | 2383 (-)    | 1417 (-)    | 4752 (-)     | 51 (-)    | 2651 (-)    | -         | 291 (-)     | 1104 (-)   | 645 (-)      | 4164 (-)    | 17459 |

**11940**

**Legend:** IVT = Intravenous Thrombolysis; MT = Mechanical Thrombectomy; mRS = modified Rankin Score; NA = do not apply, no medication costs. The groups not listed in the table are those in which there are no patients. 1= Medical Treatment; 2 = IVT; 3 = MT; 4 = IVT + MT.

**Supplementary Material VI: Median and Interquartile Range Values of Costs Based on Treatments by Center and Costs Based on Treatment by Risk Levels**

| Country       | Treatments        | Risk        | Median     | IQR 25     | IQR 75      |
|---------------|-------------------|-------------|------------|------------|-------------|
| All Countries | Medical Treatment | High Risk   | I\$ 7,850  | I\$ 4,684  | I\$ 15,433  |
|               |                   | Medium Risk | I\$ 4,790  | I\$ 3,197  | I\$ 8,165   |
|               |                   | Low Risk    | I\$ 5,235  | I\$ 3,446  | I\$ 10,159  |
|               | IVT               | High Risk   | I\$ 11,336 | I\$ 6,158  | I\$ 20,795  |
|               |                   | Medium Risk | I\$ 9,893  | I\$ 6,617  | I\$ 13,478  |
|               |                   | Low Risk    | I\$ 8,976  | I\$ 6,673  | I\$ 15,586  |
|               | MT                | High Risk   | I\$ 20,717 | I\$ 15,370 | I\$ 35,458  |
|               |                   | Medium Risk | I\$ 22,957 | I\$ 14,789 | I\$ 26,791  |
|               |                   | Low Risk    | I\$ 17,876 | I\$ 15,843 | I\$ 20,654  |
|               | IVT + MT          | High Risk   | I\$ 27,669 | I\$ 18,166 | I\$ 32,539  |
|               |                   | Medium Risk | I\$ 15,571 | I\$ 14,142 | I\$ 17,612  |
|               |                   | Low Risk    | I\$31,263  | I\$ 25,481 | I\$ 35, 255 |

**Legend:** IVT = Intravenous Trombolysis; MT = Mechanical Thrombectomy. NA = not applicable; IQR25;75: first and third quartiles.
